# Supplementary material
Source: PubMed Central journal article supplement (PMC1995156)
Supplement: cmaj_177_8_877_v2_1.pdf [file cmaj_177_8_877_v2_1.pdf]

**Appendix 1: International Classification of Diseases (ninth revision [ICD-9]) codes used to determine episodes of likely viral and bacterial infections**

| Outcome                                                                                                                | ICD-9 code                                                        |
|------------------------------------------------------------------------------------------------------------------------|-------------------------------------------------------------------|
| <b>Antibiotic prescribing for respiratory infections of likely viral etiology</b>                                      |                                                                   |
| Acute laryngitis or tracheitis                                                                                         | 464-464.2                                                         |
| Common cold                                                                                                            | 460                                                               |
| Influenza                                                                                                              | 487-487.8                                                         |
| Viral pneumonia                                                                                                        | 480-480.9                                                         |
| Unspecified acute upper respiratory tract infection                                                                    | 465.8, 465.9                                                      |
| <b>Inappropriate prescribing of a second- or third-line antibiotic for bacterial respiratory or urinary infections</b> |                                                                   |
| Acute pharyngitis or tonsillitis                                                                                       | 462, 463, 465.0, 034.0                                            |
| Acute otitis media                                                                                                     | 381.0, 381.4, 382.0, 382.4, 382.9                                 |
| Acute sinusitis                                                                                                        | 461-461.3, 461.8, 461.9                                           |
| Acute bronchitis                                                                                                       | 466.0, 466.1                                                      |
| Whooping cough                                                                                                         | 484.3, 33-33.9                                                    |
| Community-acquired pneumonia                                                                                           | 481, 482.0, 482.2-482.4, 482.8, 482.9, 483-483.1, 483.8, 485, 486 |
| Acute urinary tract infection                                                                                          | 595.0, 595.9, 599.0                                               |

Appendix to: Cadieux G, Tamblyn R, Dauphinee D, et al. Predictors of inappropriate antibiotic prescribing among primary care physicians. *CMAJ* 2007;177:877-83. Copyright © 2007, Canadian Medical Association.
