# Supplementary material
Source: PubMed Central journal article supplement (PMC1995156)
Supplement: cmaj_177_8_877_v2_2.pdf [file cmaj_177_8_877_v2_2.pdf]

**Appendix 2: Classification of antibiotics as first-, second- or third-line treatment<sup>24</sup>**

| Infection                     | Population   | First-line treatment                                                                                                                                                                                                 | Second-line treatment                                                                                                                                                                                                                                                                                                                 | Third-line treatment                                                                                                           |
|-------------------------------|--------------|----------------------------------------------------------------------------------------------------------------------------------------------------------------------------------------------------------------------|---------------------------------------------------------------------------------------------------------------------------------------------------------------------------------------------------------------------------------------------------------------------------------------------------------------------------------------|--------------------------------------------------------------------------------------------------------------------------------|
| Acute urinary tract infection | 1-12 yr      | <ul style="list-style-type: none"> <li>• Trimethoprim and sulfamethoxazole</li> <li>• Nitrofurantoin</li> </ul>                                                                                                      | <ul style="list-style-type: none"> <li>• Amoxicillin</li> <li>• Cephalexin</li> <li>• Trimethoprim</li> </ul>                                                                                                                                                                                                                         | <ul style="list-style-type: none"> <li>• Amoxicillin and clavulanic acid</li> <li>• Cefixime</li> </ul>                        |
| Pharyngitis or tonsillitis    | > 1 yr       | <ul style="list-style-type: none"> <li>• Penicillin V Benzathine</li> <li>• Penicillin V Potassium</li> <li>• Amoxicillin (1-12 yr)</li> <li>• Pivampicillin (1-12 yr)</li> <li>• Bacampicillin (1-12 yr)</li> </ul> | <ul style="list-style-type: none"> <li>• Erythromycin</li> <li>• Erythromycin estolate</li> <li>• Erythromycin ethylsuccinate</li> <li>• Erythromycin stearate</li> </ul>                                                                                                                                                             | <ul style="list-style-type: none"> <li>• Cephalexin</li> <li>• Clarithromycin (&gt; 12 yr)</li> </ul>                          |
| Otitis media                  | > 1 yr       | <ul style="list-style-type: none"> <li>• Amoxicillin</li> <li>• Pivampicillin (1-12 yr)</li> <li>• Bacampicillin (1-12 yr)</li> </ul>                                                                                | <ul style="list-style-type: none"> <li>• Trimethoprim and sulfamethoxazole</li> <li>• Erythromycin and sulfisoxazole (1-12 yr)</li> <li>• Amoxicillin and clavulanic acid</li> <li>• Cefixime</li> <li>• Cefaclor</li> <li>• Cefuroxime axetil</li> <li>• Pivampicillin (&gt; 12 yr)</li> <li>• Bacampicillin (&gt; 12 yr)</li> </ul> | <ul style="list-style-type: none"> <li>• Trimethoprim</li> <li>• Clarithromycin</li> <li>• Doxycycline (&gt; 12 yr)</li> </ul> |
| Acute sinusitis               | > 1 yr       | <ul style="list-style-type: none"> <li>• Amoxicillin</li> <li>• Pivampicillin (1-12 yr)</li> <li>• Bacampicillin (1-12 yr)</li> </ul>                                                                                | <ul style="list-style-type: none"> <li>• Trimethoprim and sulfamethoxazole</li> <li>• Erythromycin and sulfisoxazole</li> <li>• Amoxicillin and clavulanic acid</li> <li>• Cefixime</li> <li>• Cefaclor</li> <li>• Cefixime axetil</li> <li>• Pivampicillin (&gt; 12 yr)</li> <li>• Bacampicillin (&gt; 12 yr)</li> </ul>             | <ul style="list-style-type: none"> <li>• Trimethoprim</li> <li>• Clarithromycin</li> <li>• Doxycycline (&gt; 12 yr)</li> </ul> |
| Whooping cough                | All patients | <ul style="list-style-type: none"> <li>• Erythromycin</li> <li>• Erythromycin estolate</li> <li>• Erythromycin ethylsuccinate</li> <li>• Erythromycin stearate</li> </ul>                                            | <ul style="list-style-type: none"> <li>• Trimethoprim and sulfamethoxazole</li> </ul>                                                                                                                                                                                                                                                 | <ul style="list-style-type: none"> <li>• Tetracycline</li> <li>• Amoxicillin</li> <li>• Ampicillin</li> </ul>                  |
| Acute Bronchitis              | 1-12 yr      | • No antibiotics indicated                                                                                                                                                                                           | • No antibiotics indicated                                                                                                                                                                                                                                                                                                            | • No antibiotics indicated                                                                                                     |
|                               | > 12 yr      | <ul style="list-style-type: none"> <li>• Tetracycline</li> <li>• Erythromycin</li> <li>• Erythromycin estolate</li> <li>• Erythromycin ethylsuccinate</li> <li>• Erythromycin stearate</li> </ul>                    | <ul style="list-style-type: none"> <li>• Doxycycline</li> <li>• Clarithromycin</li> </ul>                                                                                                                                                                                                                                             | • No recommendations provided                                                                                                  |

Continued

Appendix 2: Continued

| Infection                     | Population                                                                                                           | First-line treatment                                                                                                                                                                                                                                                                                                                                                                                                             | Second-line treatment                                                                                                                                                                                                                                                     | Third-line treatment                                                                                      |
|-------------------------------|----------------------------------------------------------------------------------------------------------------------|----------------------------------------------------------------------------------------------------------------------------------------------------------------------------------------------------------------------------------------------------------------------------------------------------------------------------------------------------------------------------------------------------------------------------------|---------------------------------------------------------------------------------------------------------------------------------------------------------------------------------------------------------------------------------------------------------------------------|-----------------------------------------------------------------------------------------------------------|
| Pneumonia                     | 1-12 yr                                                                                                              | <ul style="list-style-type: none"> <li>• Amoxicillin</li> <li>• Pivampicillin</li> <li>• Erythromycin</li> <li>• Erythromycin estolate</li> <li>• Erythromycin ethylsuccinate</li> <li>• Erythromycin stearate</li> <li>• Bacampicillin</li> </ul>                                                                                                                                                                               | <ul style="list-style-type: none"> <li>• Trimethoprim and sulfamethoxazole</li> <li>• Clarithromycin</li> <li>• Erythromycin and sulfisoxazole</li> <li>• Amoxicillin and clavulanic acid</li> <li>• Cefixime</li> <li>• Cefaclor</li> <li>• Cefuroxime axetil</li> </ul> | <ul style="list-style-type: none"> <li>• No recommendations provided</li> </ul>                           |
|                               | > 12 yr                                                                                                              | <ul style="list-style-type: none"> <li>• Tetracycline</li> <li>• Erythromycin</li> <li>• Erythromycin estolate</li> <li>• Erythromycin ethylsuccinate</li> <li>• Erythromycin stearate</li> </ul>                                                                                                                                                                                                                                | <ul style="list-style-type: none"> <li>• Doxycycline</li> <li>• Clarithromycin</li> </ul>                                                                                                                                                                                 | <ul style="list-style-type: none"> <li>• No recommendations provided</li> </ul>                           |
|                               | > 12 yr<br>(with diabetes, renal insufficiency, chronic heart failure or admission to hospital in the previous year) | <ul style="list-style-type: none"> <li>• Trimethoprim and sulfamethoxazole</li> <li>• Cefaclor</li> <li>• Cefuroxime axetil</li> <li>• Amoxicillin and clavulanic acid</li> </ul> <p>Any one of the above and/or one of:</p> <ul style="list-style-type: none"> <li>• Erythromycin</li> <li>• Erythromycin estolate</li> <li>• Erythromycin ethylsuccinate</li> <li>• Erythromycin stearate</li> <li>• Clarithromycin</li> </ul> | <ul style="list-style-type: none"> <li>• No recommendations provided</li> </ul>                                                                                                                                                                                           | <ul style="list-style-type: none"> <li>• No recommendations provided</li> </ul>                           |
| Acute urinary tract infection | 1-12 yr                                                                                                              | <ul style="list-style-type: none"> <li>• Trimethoprim and sulfamethoxazole</li> <li>• Nitrofurantoin</li> </ul>                                                                                                                                                                                                                                                                                                                  | <ul style="list-style-type: none"> <li>• Amoxicillin</li> <li>• Cephalexin</li> <li>• Trimethoprim</li> </ul>                                                                                                                                                             | <ul style="list-style-type: none"> <li>• Amoxicillin and clavulanic acid</li> <li>• Cefixime</li> </ul>   |
|                               | >12 yr                                                                                                               | <ul style="list-style-type: none"> <li>• Trimethoprim and sulfamethoxazole</li> <li>• Trimethoprim</li> <li>• Nitrofurantoin</li> </ul>                                                                                                                                                                                                                                                                                          | <ul style="list-style-type: none"> <li>• Amoxicillin</li> <li>• Ofloxacin</li> <li>• Norfloxacin</li> <li>• Ciprofloxacin</li> </ul>                                                                                                                                      | <ul style="list-style-type: none"> <li>• Cephalexin</li> <li>• Amoxicillin and clavulanic acid</li> </ul> |
