# Supplementary material
Source: PubMed Central journal article supplement (PMC1995156)
Supplement: cmaj_177_8_877_v2_3.pdf [file cmaj_177_8_877_v2_3.pdf]

**Appendix 3: Predictors of inappropriate antibiotic prescribing among 726 primary care physicians who wrote the Medical Council of Canada Qualifying Examination between 1990 and 1993**

| Predictor                         | Likely viral respiratory infection    |                                                   | Likely bacterial infection           |                                                                         |
|-----------------------------------|---------------------------------------|---------------------------------------------------|--------------------------------------|-------------------------------------------------------------------------|
|                                   | No. of episodes<br><i>n</i> = 104 230 | Antibiotic prescription;<br>Adjusted* RR (95% CI) | No. of episodes<br><i>n</i> = 65 304 | Second- or third-line antibiotic prescription;<br>Adjusted* RR (95% CI) |
| MCCQE infectious disease subscore | 104 230                               | 1.06 (0.99-1.13)                                  | 65 304                               | 1.00 (1.00-1.00) non-linear, non-monotonic                              |
| Undergraduate medical school      |                                       |                                                   |                                      |                                                                         |
| Montréal†                         | 36 095                                | 1.00                                              | 30 586                               | 1.00                                                                    |
| Laval                             | 29 224                                | 1.03 (0.88-1.20)                                  | 18 964                               | 1.12 (0.99-1.28)                                                        |
| McGill                            | 4 281                                 | 1.01 (0.71-1.43)                                  | 3 089                                | 0.74 (0.60-0.92)                                                        |
| Sherbrooke                        | 21 626                                | 1.00 (0.83-1.20)                                  | 14 021                               | 1.06 (0.92-1.23)                                                        |
| Other Canadian or US school       | 3 135                                 | 1.12 (0.85-1.47)                                  | 3 355                                | 0.79 (0.61-1.01)                                                        |
| International school              | 9 869                                 | 1.78 (1.30-2.44)                                  | 7 582                                | 0.87 (0.69-1.09)                                                        |
| Year in practice (per year)       |                                       | 1.04 (1.02-1.05)                                  |                                      | 1.11 (1.09-1.13)                                                        |
| No. of patients per day, mean‡    |                                       |                                                   |                                      |                                                                         |
| 1-21.1†                           | 25 567                                | 1.00                                              | 19 049                               | 1.00                                                                    |
| 21.2-27.0                         | 26 385                                | 1.07 (0.95-1.20)                                  | 19 284                               | 1.07 (0.96-1.19)                                                        |
| 27.1-33.9                         | 25 872                                | 1.07 (0.92-1.25)                                  | 19 515                               | 1.17 (1.03-1.32)                                                        |
| 34.0-77.5                         | 26 406                                | 1.27 (1.09-1.48)                                  | 19 749                               | 1.20 (1.06-1.37)                                                        |

Note: RR = risk ratio, CI = confidence interval.

\*Adjusted for physician sex, infection diagnosis, patient sex, patient age, number of primary care physicians seen, number of visits to primary care physicians in the year before the episode, patient income, patient net educational level, patient geographic area of residence and type of primary care visit setting.

†reference group.

‡Daily practice volume is the mean number of patients seen per physician workday in the year the event occurred; categories correspond to quarters.
